# Supplementary material
Source: PubMed Central journal article supplement (PMC5066347)
Supplement: AEM.01170-16_zam999117475so1.pdf [file AEM.01170-16_zam999117475so1.pdf]

Supplementary Table 1. PCR primers targeting the 16S rRNA gene hypervariable regions and their percent coverage to the RDP database (version 10.27).

| Hypervariable region | Primer                  | Sequence               | Bacteria   |              | Archaea    |                                                                                                                   | Reference                              |
|----------------------|-------------------------|------------------------|------------|--------------|------------|-------------------------------------------------------------------------------------------------------------------|----------------------------------------|
|                      |                         |                        | 0 mismatch | 2 mismatches | 0 mismatch | 2 mismatches                                                                                                      |                                        |
| V3                   | 341F                    | CCTACGGGAGGCAGCAG      | 94.44%     | 99.68%       | 0.00%      | 64.61%                                                                                                            | Bartram et al., 2011<br>(soil)         |
|                      | 518R                    | ATTACCGCGGCTGCTGG      | 88.52%     | 99.75%       | 0.30%      | 82.09%                                                                                                            |                                        |
| V5                   | 784DEG                  | GGMTTAGATACCC          | 97.31%     | 99.87%       | 95.22%     | 99.75%                                                                                                            | Lazarevic et al., 2009<br>(mouth)      |
|                      | 880RDEG                 | CRTACTHCHCAGGYG        | 95.81%     | 99.90%       | 83.00%     | 99.72%                                                                                                            |                                        |
| V6                   | L-V6                    | CAACGCGARGAACCTTACC    | 66.46%     | 97.74%       | 0.00%      | 5.06%                                                                                                             | Hummelen et al., 2010<br>(vagina)      |
|                      | R-V6                    | ACAACACGAGCTGACGAC     | 4.67%      | 99.51%       | 0.00%      | 25.76%                                                                                                            |                                        |
|                      | 976F                    | CAACGCGAAGAACCTTACC    | 66.10%     | 89.10%       | 0.00%      | 0.00%                                                                                                             | Sogin et al., 2006 (sea)               |
|                      | 1046R                   | CGACAGCCATGCANCACT     | 42.80%     | 99.80%       | 0.00%      | 71.20%                                                                                                            |                                        |
|                      | 970F                    | CGCGAAGAACCTTACC       | 67.30%     | 99.60%       | 0.00%      | 5.50%                                                                                                             | Degnan & Ochman, 2011<br>(feces)       |
|                      | 1050R                   | ACGACAGCCATGCANC       | 43.20%     | 99.88%       | 0.00%      | 92.20%                                                                                                            |                                        |
|                      | 917F                    | GAATTGACGGGRCCCGC      | 86.10%     | 99.60%       | 0.00%      | 0.04%                                                                                                             | Keijser et al., 2008<br>(mouth)        |
|                      | 1061R                   | CACGRCACGAGCTGACGAC    | 92.10%     | 99.90%       | 1.40%      | 65.30%                                                                                                            |                                        |
|                      | E1052-1072              | TGCATGGYGTGTCGTCAGCTCG | 93.07%     | n.a.         | 0.02%      | n.a.                                                                                                              | Wang & Qian, 2009 ( <i>in silico</i> ) |
|                      | U1052-1071              | TGCATGGYYGYCGYCAGYTC   | 95.90%     | n.a.         | 88.92%     | n.a.                                                                                                              |                                        |
| E949-964             | ATGTGGTTTAATTCGA        | 71.36%                 | n.a.       | 0.00%        | n.a.       | Wang & Qian., 2009;<br>Liu et al., 2007 (various)<br>Wang & Qian, 2009;<br>Huws et al., 2007 ( <i>in silico</i> ) |                                        |
| E917F                | GAATTGACGGGRCCC         | 86.29%                 | n.a.       | 0.00%        | n.a.       |                                                                                                                   |                                        |
| E939R                | CTTGTGCGGGCCCCCGTCAATTC | 54.28%                 | n.a.       | 0.00%        | n.a.       |                                                                                                                   |                                        |

Supplementary Table 2. Complete list of environmental parameters

| Environmental parameters                                                         | Abbreviation   |
|----------------------------------------------------------------------------------|----------------|
| <b>Soil physico-chemical composition: Edaphic factors</b>                        |                |
| Soil temperature at depth -5cm (°C)                                              | ST             |
| pH                                                                               | pH             |
| Electrical conductivity (µS/cm)                                                  | EC             |
| Stable isotopic carbon ratio (per mL vs VPDB)                                    | δ13C / C13     |
| Stable isotopic nitrogen ratio (per mL vs. N <sub>2</sub> in Air)                | δ15N / N15     |
| Bulk carbon content (wt %)                                                       | C              |
| Bulk hydrogen content (wt %)                                                     | H              |
| Bulk nitrogen content (wt %)                                                     | N              |
| C:N ratio                                                                        | CN             |
| Total phosphorus (mg/g)                                                          | P              |
| Soluble phosphorus content (mgP/kg DW)                                           | avP            |
| Hydrogen index (mg HC/g TOC)                                                     | HI             |
| Oxygen index (mg CO <sub>2</sub> /g TOC)                                         | OI             |
| Total organic carbon content (wt %)                                              | TOC            |
| Mineral carbon content (wt %)                                                    | MiC            |
| Bulk soil gravimetric water content (40°C, %)                                    | BSW            |
| Sieved soil gravimetric water content (105°C, %)                                 | GSW            |
| Temperature of maximal pyrolytic yield (T-max, °C)                               | Tmx            |
| <b>Soil physico-chemical composition: Major elements</b>                         |                |
| SiO <sub>2</sub> (wt %)                                                          | Si             |
| TiO <sub>2</sub> (wt %)                                                          | Ti             |
| Al <sub>2</sub> O <sub>3</sub> (wt %)                                            | Al             |
| Fe <sub>2</sub> O <sub>3</sub> (wt %)                                            | Fe             |
| MnO (wt %)                                                                       | Mn             |
| MgO (wt %)                                                                       | Mg             |
| CaO (wt %)                                                                       | Ca             |
| Na <sub>2</sub> (wt %)                                                           | Na             |
| K <sub>2</sub> O                                                                 | K              |
| P <sub>2</sub> O <sub>5</sub> (wt %)                                             | P2O            |
| Cr <sub>2</sub> O <sub>3</sub> (wt %)                                            | Cr             |
| NiO (wt %)                                                                       | Ni             |
| <b>Soil physico-chemical composition: Mineralogy</b>                             |                |
| Phyllosilicate (%)                                                               | PSi            |
| Quartz (%)                                                                       | Qua            |
| Feldspath-K (%)                                                                  | Feld           |
| Plagioclase-Na (%)                                                               | Pla            |
| Calcite (%)                                                                      | Cal            |
| Dolomite (%)                                                                     | Dol            |
| Goethite (%)                                                                     | Geo            |
| Ankerite (%)                                                                     | Ank            |
| Indoses (%)                                                                      | Ind            |
| Organic matter content via loss of ignition (wt %)                               | OM             |
| <b>Topographic parameters</b>                                                    |                |
| Longitude, x (Swiss coordinates system)                                          | Lon            |
| Latitude, y (Swiss coordinates system)                                           | Lat            |
| Elevation (m)                                                                    | Alt            |
| Terrain slope (°)                                                                | slope / slop   |
| Direction that a slope faces (°/°)                                               | asp25 / asp    |
| Sine transformed asp25 (°/°)                                                     | aspval / aspv  |
| Topographic position                                                             | topos / top    |
| <b>Climatic parameters</b>                                                       |                |
| Air temperature (°C)                                                             | N.A.           |
| Annual degree days (day*deg)                                                     | ddeg0 / deg    |
| Monthly moisture index ((1/10mm)/month)                                          | mmind68 / min  |
| Daily average of global potential shortwave radiation per month (kJ/day)         | summrady / srd |
| Monthly average temperature (°C*100)                                             | taveyy / tav   |
| Annual average site water balance accounting for soil properties (1/10mm / year) | swb            |
| Topographic wetness index                                                        | twi25 / twi    |
| Annual average number of frost days during the growing season (day*100)          | sfroyy / sfro  |
| Number of precipitation days per growing season (day)                            | pday / pda     |
| Monthly mean precipitation sum (mm)                                              | precyy / prc   |

Supplementary Table 3. Spearman correlations between Bacteroidetes groups and soil soluble phosphorus content.

| <b>Taxonomic group</b>                                                          | <b>rho</b>       | <b>pval</b>   |
|---------------------------------------------------------------------------------|------------------|---------------|
| Bacteroidetes Richness                                                          | <b>0.3147742</b> | 0.0101        |
| Bacteroidetes abundance                                                         | <b>0.4127544</b> | 0.0006        |
| Class Cytophagia richness                                                       | -0.1248956       | <i>0.3177</i> |
| Class Cytophagia abundance                                                      | -0.1871282       | <i>0.1324</i> |
| Class Flavobacteriia richness                                                   | -0.1545922       | <i>0.2152</i> |
| Class Flavobacteriia abundance                                                  | 0.02717908       | <i>0.8285</i> |
| Class Saprospirae richness                                                      | -0.1268913       | <i>0.3100</i> |
| Class Saprospirae abundance                                                     | -0.1313642       | <i>0.2923</i> |
| Class Sphingobacteriia richness                                                 | -0.06126204      | <i>0.6251</i> |
| Class Sphingobacteriia abundance                                                | -0.03473578      | <i>0.7819</i> |
| Cytophagia; family undefined                                                    | <b>0.4825635</b> | < 0.0001      |
| Cytophagia; family Amoebophilaceae                                              | -0.1930786       | <i>0.1204</i> |
| Cytophagia; family Cyclobacteriaceae                                            | -0.1043033       | <i>0.4046</i> |
| Cytophagia; family Cytophagaceae                                                | <b>0.4431108</b> | 0.0002        |
| Cytophagia; family Flammeovirgaceae                                             | <b>0.3167463</b> | 0.0096        |
| Flavobacteriia; family undefined                                                | 0.09165792       | <i>0.4642</i> |
| Flavobacteriia; family Weeksellaceae                                            | <b>0.4547138</b> | 0.0001        |
| Flavobacteriia; family Cryomorphaceae                                           | -0.09854788      | <i>0.4311</i> |
| Flavobacteriia; family Flavobacteriaceae                                        | <b>0.4905593</b> | 0.0000        |
| Saprospirae; family undefined                                                   | 0.02360067       | <i>0.8508</i> |
| Saprospirae; family Chitinophagaceae                                            | <b>0.3442438</b> | 0.0049        |
| Saprospirae; family Saprospiraceae                                              | -0.06064085      | <i>0.6278</i> |
| Sphingobacteriia; family undefined                                              | 0.2176436        | <i>0.0792</i> |
| Sphingobacteriia; family Sphingobacteriaceae                                    | <b>0.2901492</b> | 0.0181        |
| <b>OTUs in Bacteroidetes-avP module</b>                                         |                  |               |
| c_Sphingobacteriia; o_Sphingobacteriales; f_; g_; s_                            | <b>0.4198781</b> | 0.0004        |
| c_Sphingobacteriia; o_Sphingobacteriales; f_; g_; s_                            | <b>0.4296077</b> | 0.0003        |
| c_Sphingobacteriia; o_Sphingobacteriales; f_; g_; s_                            | <b>0.6308022</b> | < 0.0001      |
| c_Sphingobacteriia; o_Sphingobacteriales; f_; g_; s_                            | <b>0.4253544</b> | 0.0004        |
| c_Flavobacteriia; o_Flavobacteriales; f_Flavobacteriaceae; g_; s_               | <b>0.3622746</b> | 0.0028        |
| c_Flavobacteriia; o_Flavobacteriales; f_Flavobacteriaceae; g_Flavobacterium; s_ | <b>0.4188436</b> | 0.0005        |
| c_Flavobacteriia; o_Flavobacteriales; f_Flavobacteriaceae; g_Flavobacterium; s_ | <b>0.4653918</b> | < 0.0001      |

The significant coefficients are indicated in bold letters, while the non-significant p-values are italicised.

Only the results from the four most abundant Bacteroidetes classes are shown.

One Bacteroidetes family was omitted from the analysis because only a single rare OTU was present in the dataset.

**A**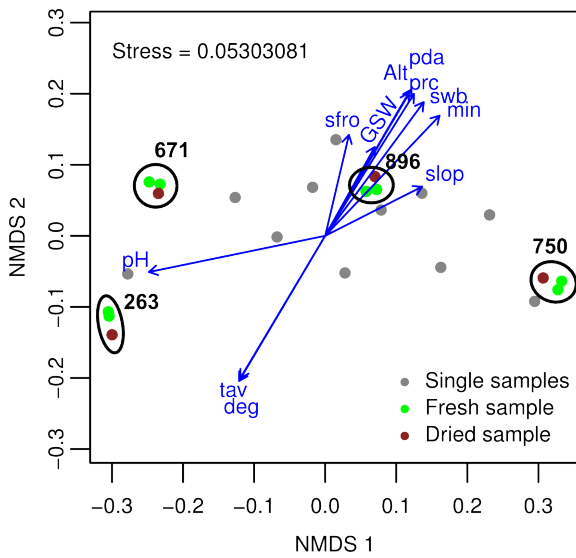**B**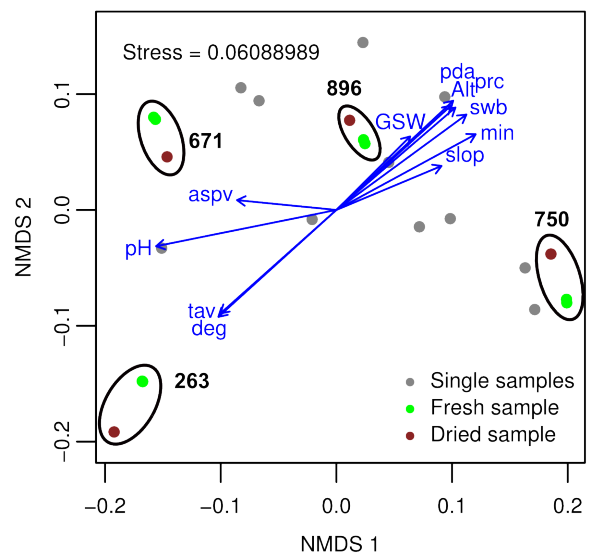

Supplementary Figure 1. Principal coordinate analysis ordination of the (A) unweighted and (B) weighted UniFrac distance matrices of the soil samples where the DNA was extracted from fresh samples (green) or from the dried samples (brown). The duplicate fresh (green) samples for each site are replicate sequencing runs from the same PCR product, used as a reference point in assessing the level of variation that is present within sequenced samples. The communities from freshly extracted soil samples which were not included in the treatment study are colored in gray. The environmental parameters that were available for this small-scale study are the following pH, GSW, deg, slop, min, srd, tav, top, asp, aspv, swb, twi, sfro, Alt, and prc. Those parameters that were significant drivers of the bacterial communities ( $p > 0.05$ ) are shown in the ordination space.

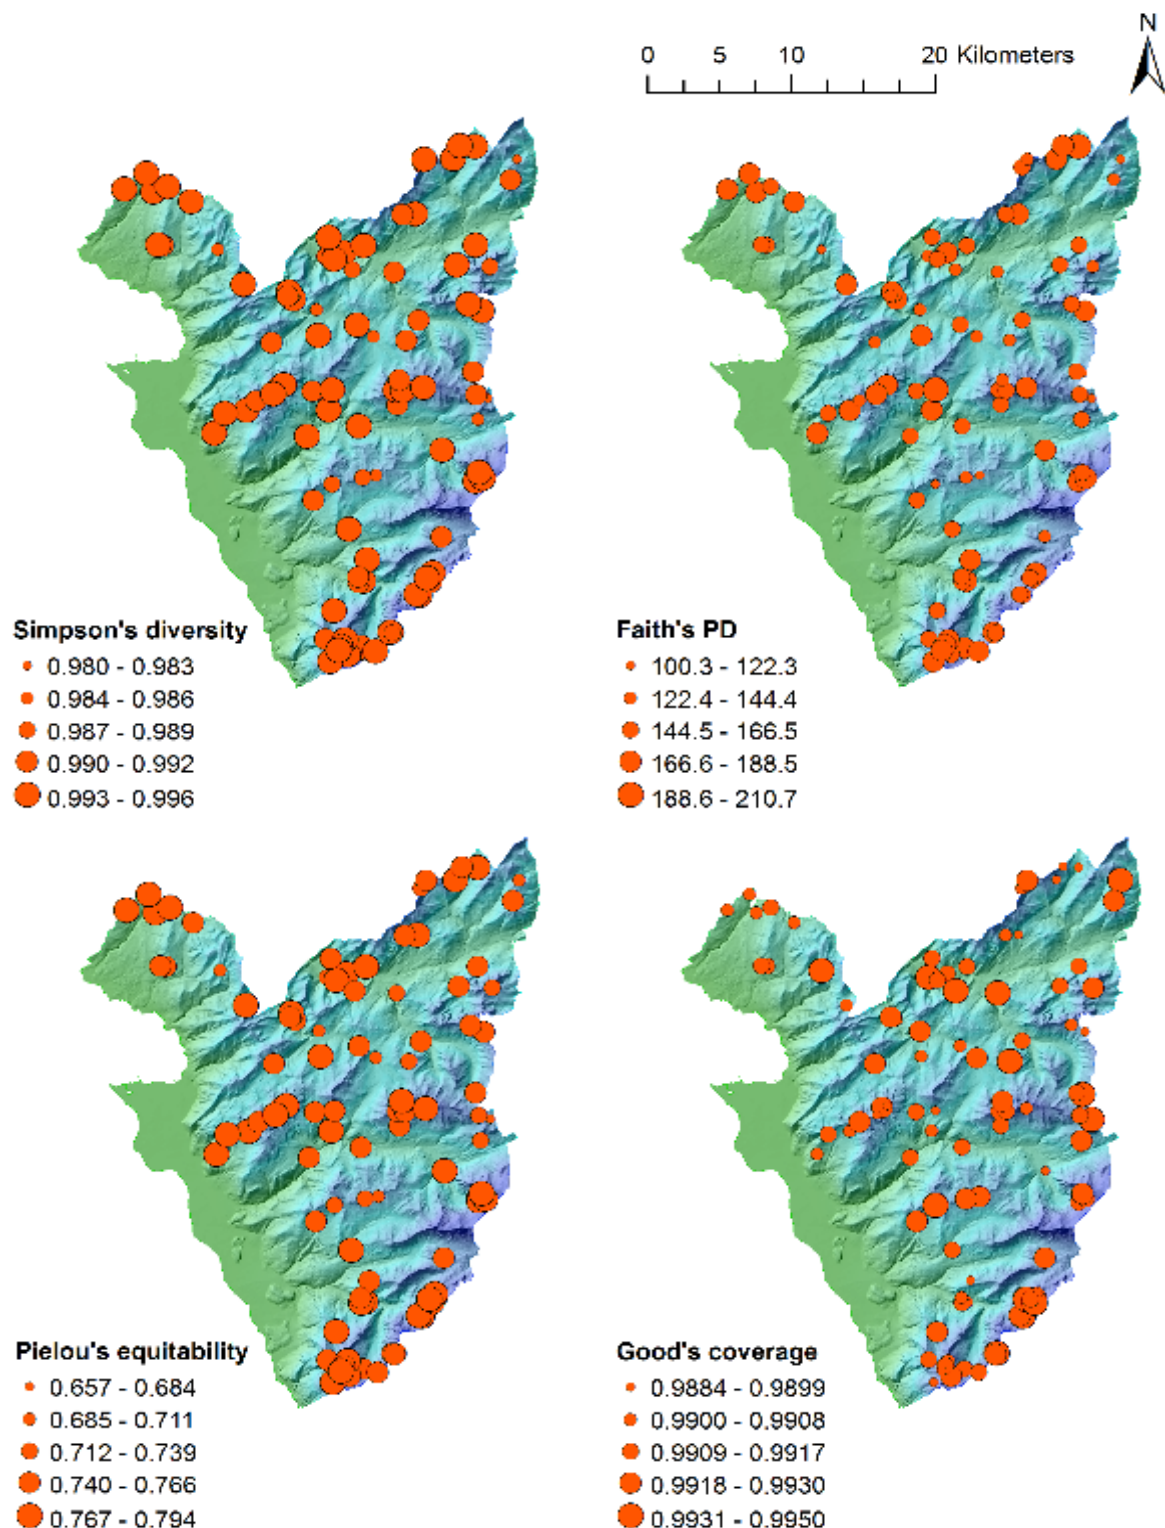

Supplementary Figure 2. Distribution of the bacterial community diversity measures across the alpine landscape. The Simpson's diversity, Faith's phylogenetic diversity, Pielou's equitability, and Good's coverage indices were 0.992 (s.d. 0.003), 157.3 (s.d. 20.8), 0.758 (s.d. 0.025), and 0.991 (s.d. 0.001), respectively. Base maps reproduced by permission of swisstopo (BA16075).

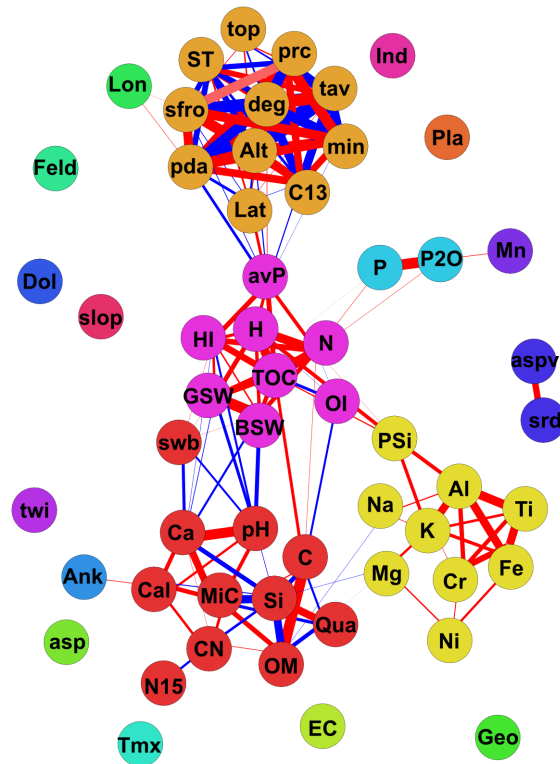

Supplementary Figure 3. The Spearman's rank based correlation networks of the 56 environmental variables measured for the 100 sites. Positive correlations have red edges, while the negative have blue edges. Only those edges with coefficients greater than  $\pm 0.5$  are shown, and the edge thickness displays the strength of the correlation. Refer to Supplementary Table 1 for the complete explanation of the environmental parameter abbreviations. Note how several parameters are directly or indirectly dependent, for example Alt (altitude) with deg (degree), etc.

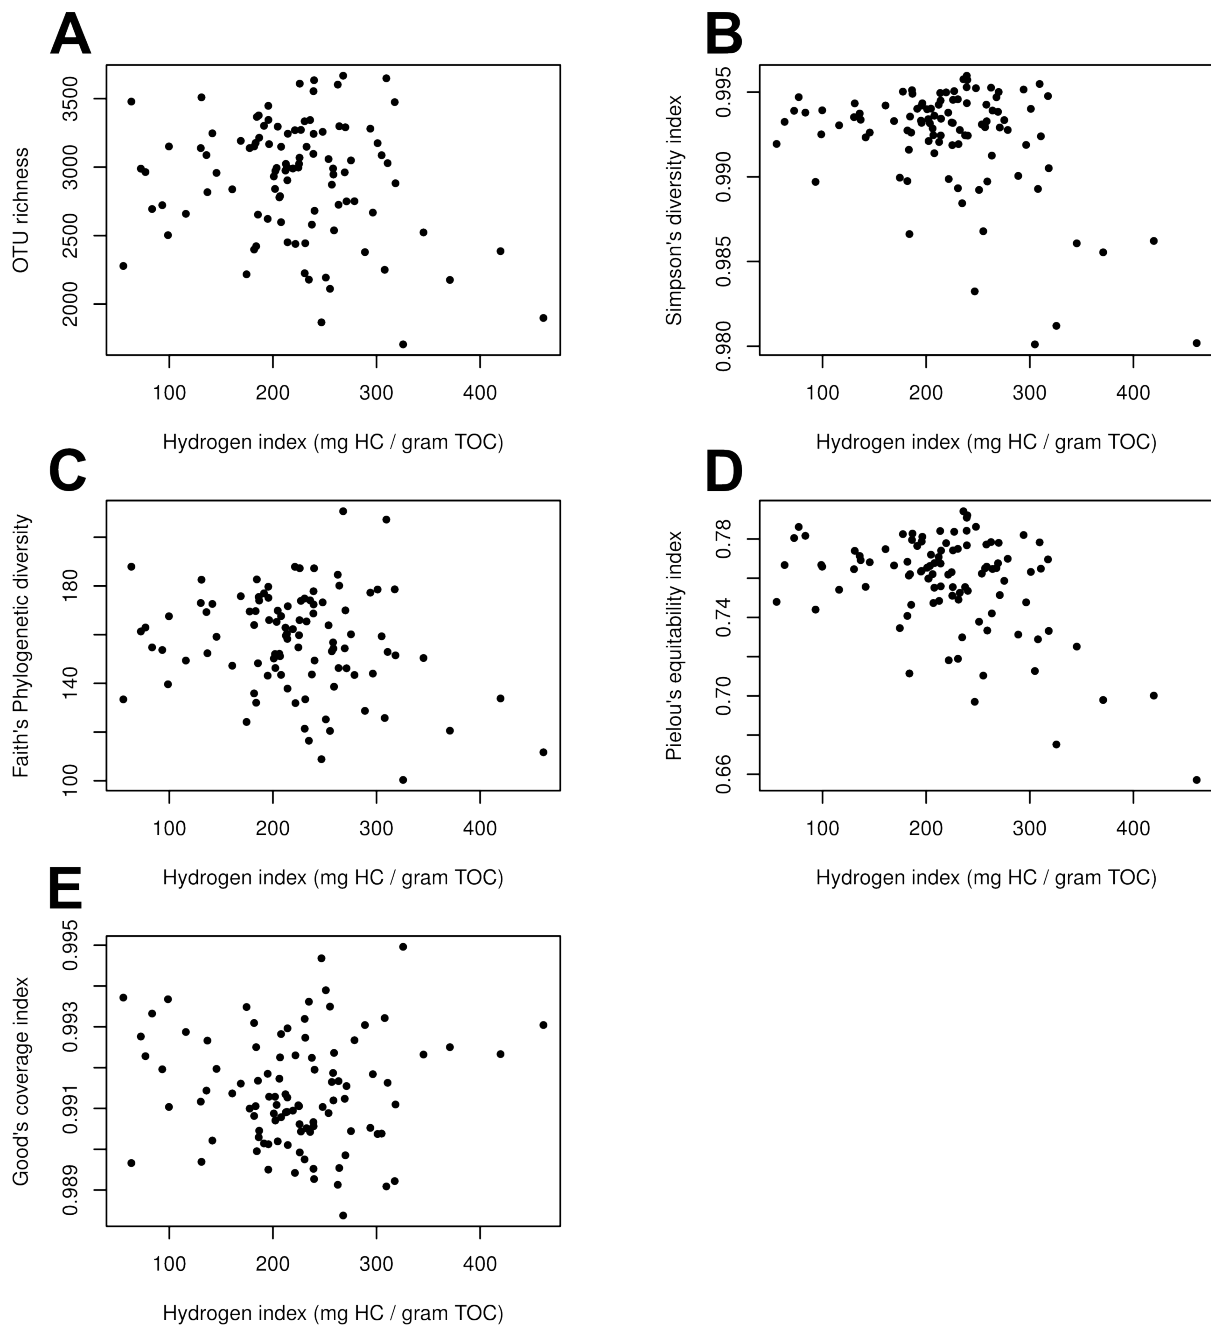

Supplementary Figure 4. Diversity indices of the alpine soil bacteria as a function of the hydrogen index (mg hydrocarbon/g TOC). Note that the hydrogen index indicates the amount of fresh organic matter that is present in the soil. (A) OTU richness, (B) Simpson's diversity, (C) Faith's phylogenetic diversity, (D) Pielou's equitability, and (E) Good's coverage.



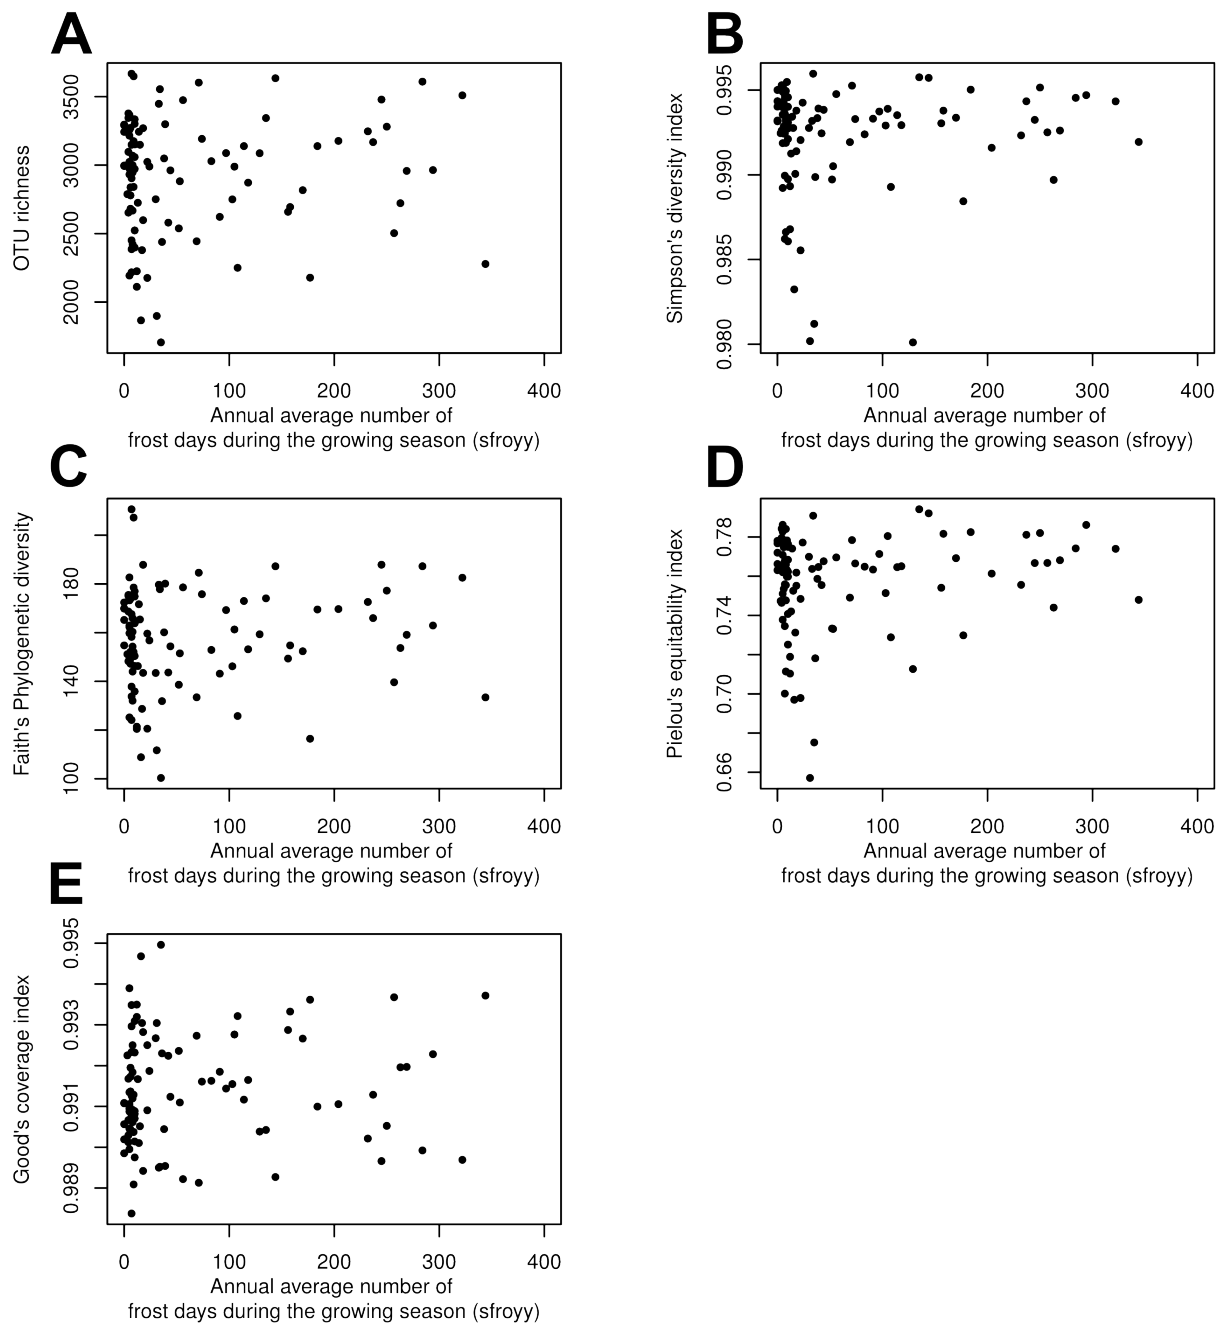

Supplementary Figure 5. Diversity indices of the alpine soil bacteria as a function of the annual average number of frost days during the growing season (sfroyy). (A) OTU richness, (B) Simpson's diversity, (C) Faith's phylogenetic diversity, (D) Pielou's equitability, and (E) Good's coverage.

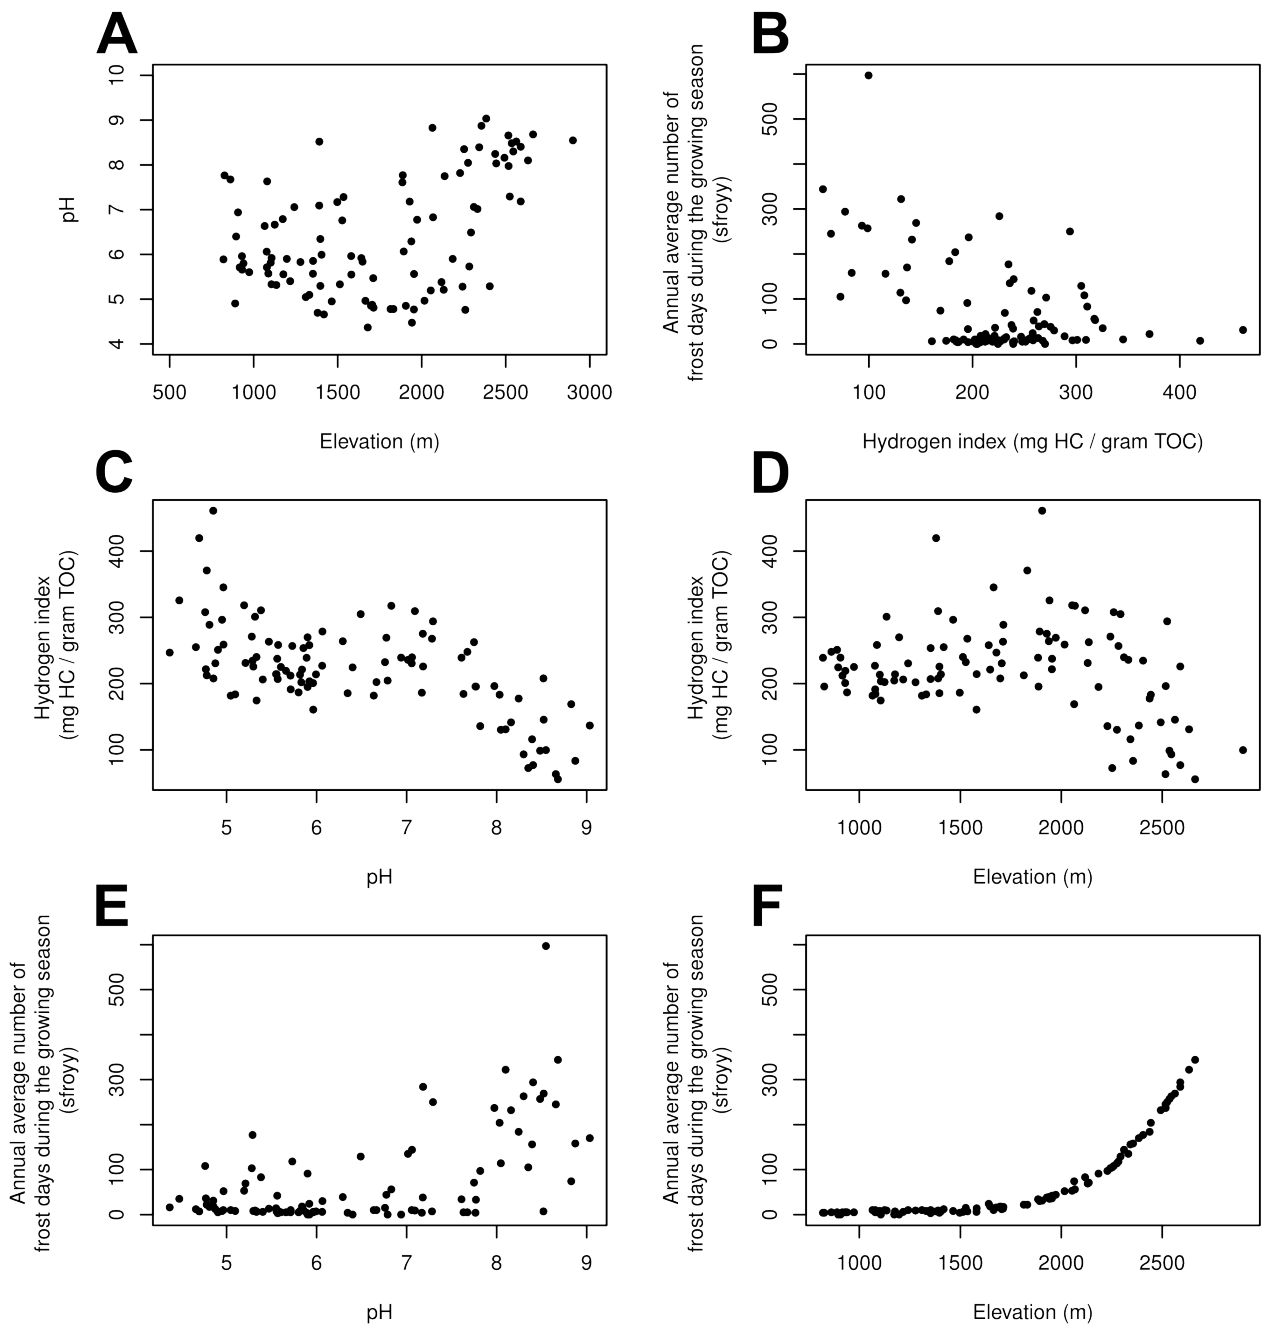

Supplementary Figure 6. Relationship between elevation, pH, hydrogen index, and annual average number of frost days during the growing season. (A) The soil pH across the elevation gradient; (B) the annual average number of frost days as a function of the soil hydrogen index; (C) the soil hydrogen index as a function of soil pH; (D) the soil hydrogen index across the elevation gradient; (E) the annual average number of frost days as a function of pH and (F) across the elevation gradient.

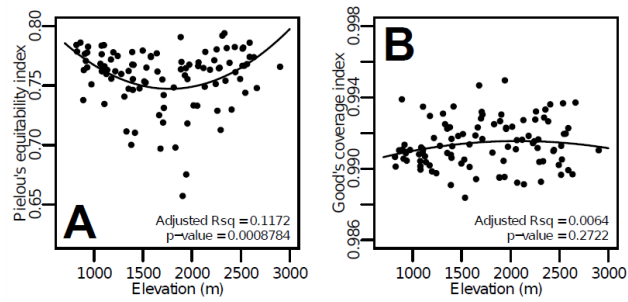

Supplementary Figure 7. Relationship between soil bacterial diversity and elevation. (A) Pielou's equitability index, and (B) Good's coverage index. Points correspond to individual sites. Quadratic trendlines are shown, which were calculated using the `lm()` function in R. the adjusted R squared values indicate the 'goodness of fit' of the bacterial diversity to respective trendlines. p-values indicate the significance of the overall model.

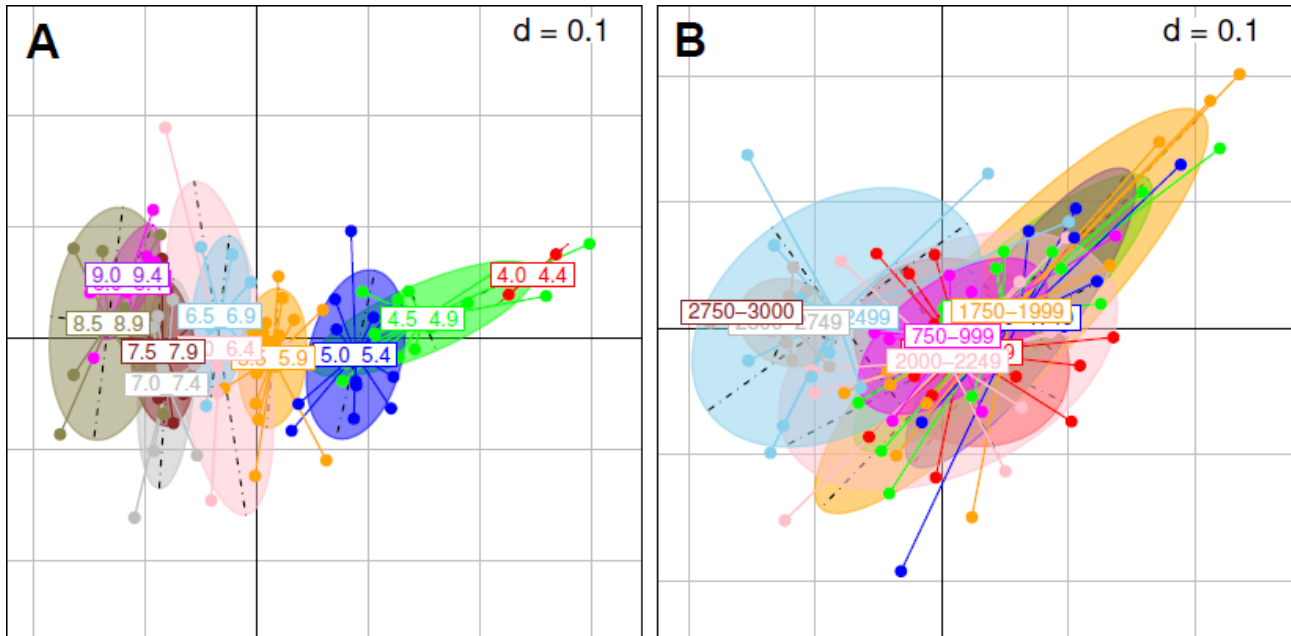

Supplementary Figure 8. Between class analysis of the alpine soil bacterial community structure (NMDS of the weighted UniFrac matrix) as a function of (A) soil pH and (B) elevation. The colors and ellipses show the respective pH or elevation groups.

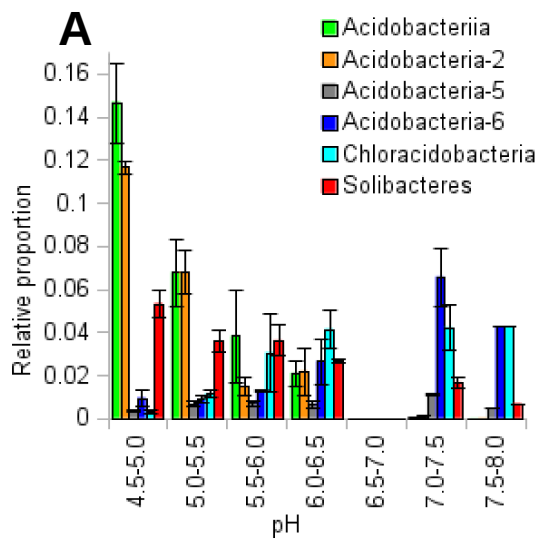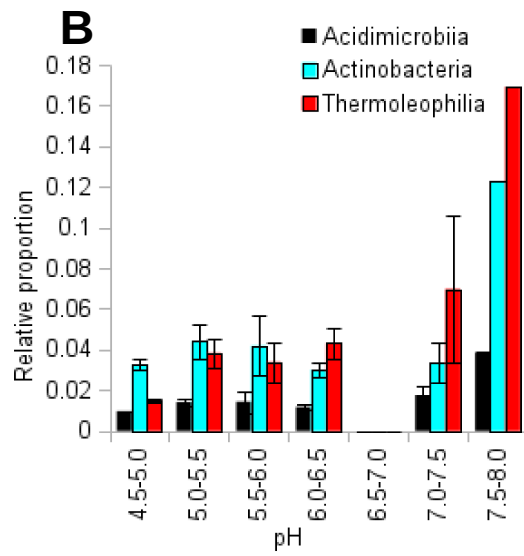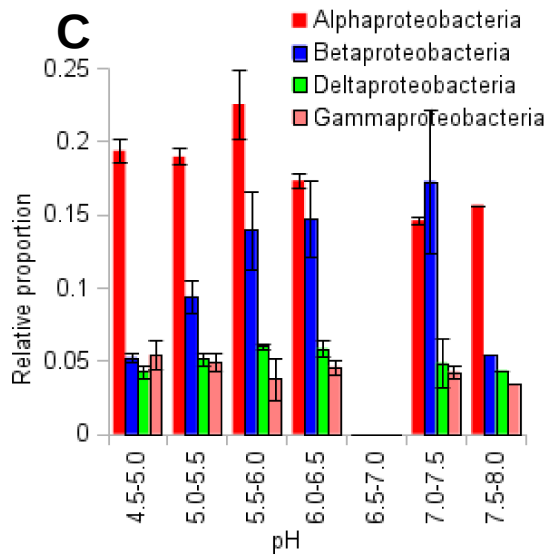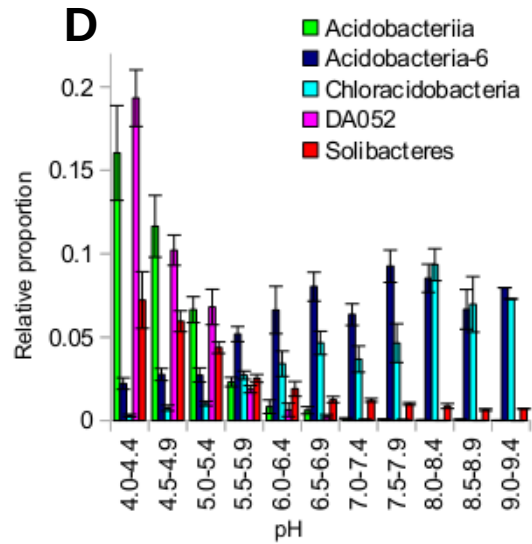

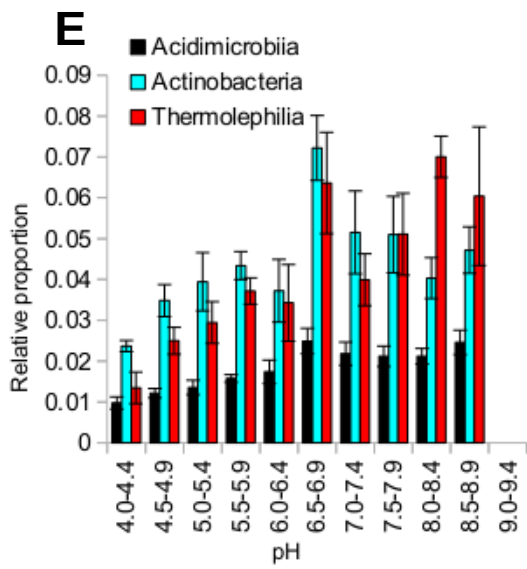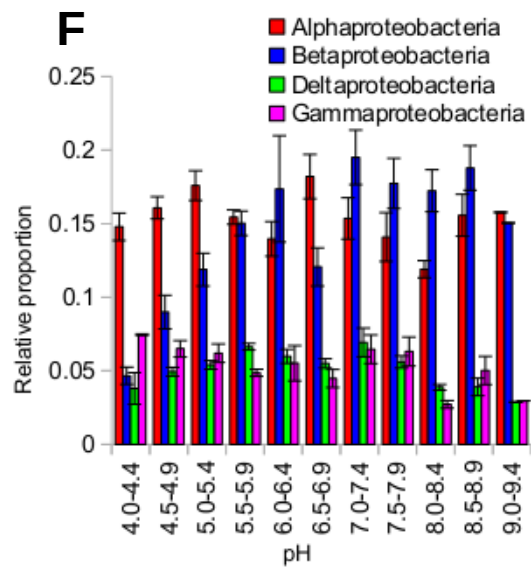

Supplementary Figure 9. pH trend across the major classes within the Acidobacteria, Actinobacteria, and Proteobacteria for the 2011 samples (A-C) and 2012 samples (D-F).

# A

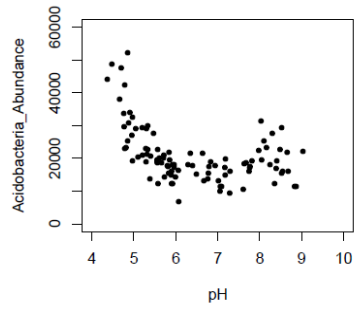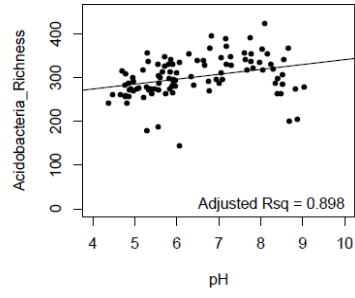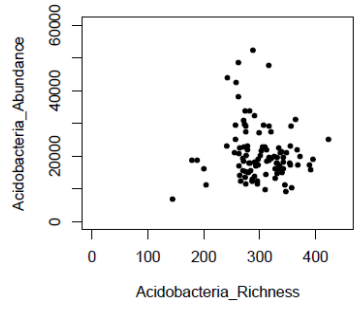

# B

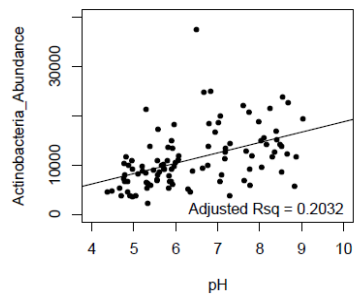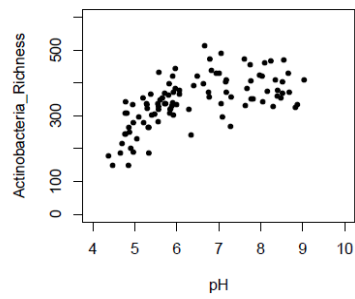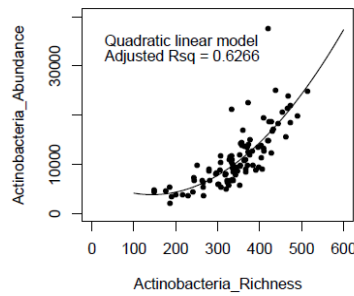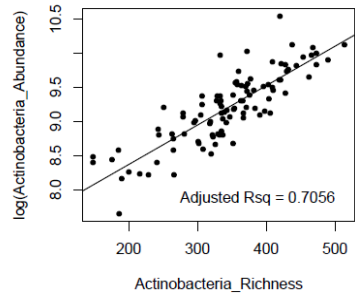

C

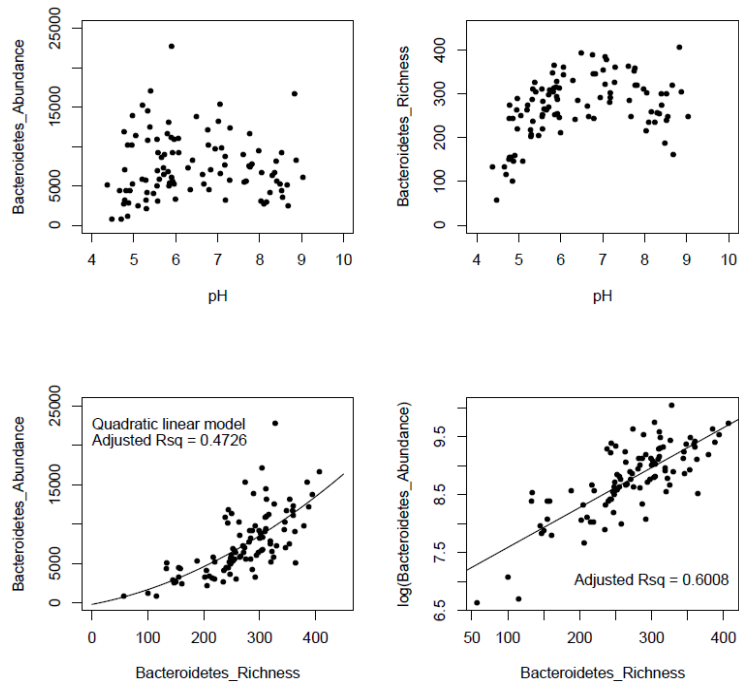

D

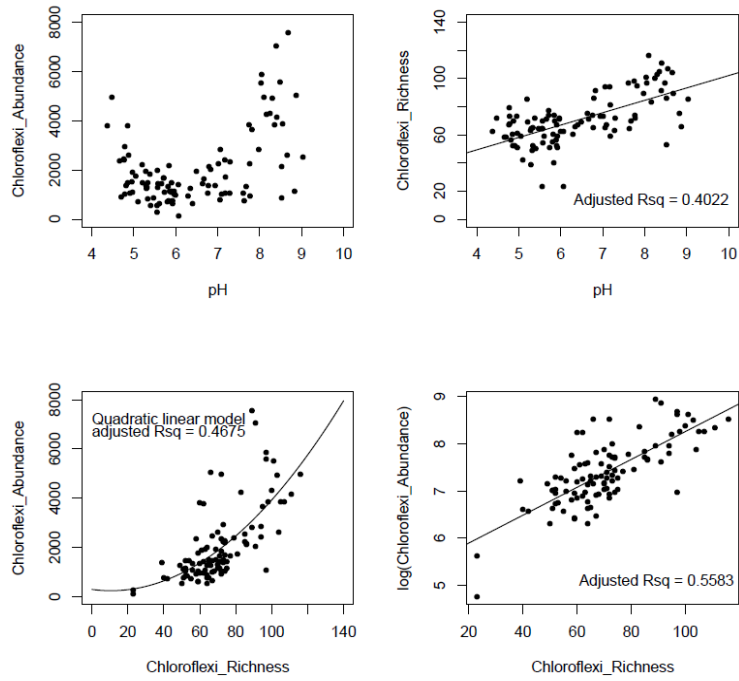

**E**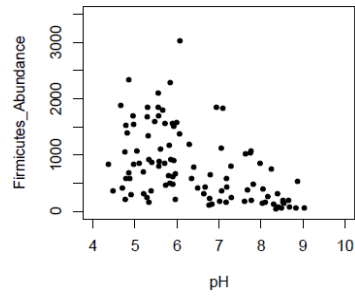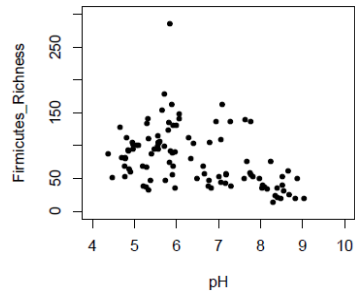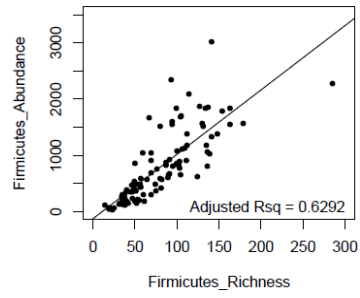**F**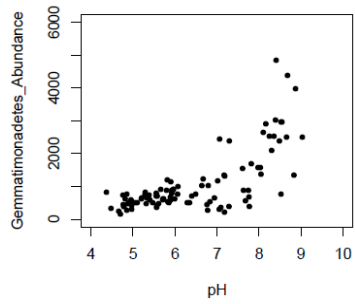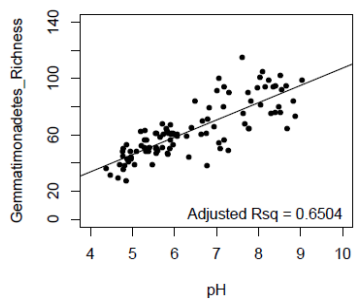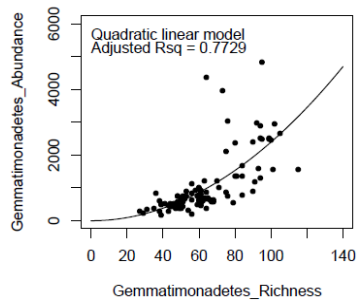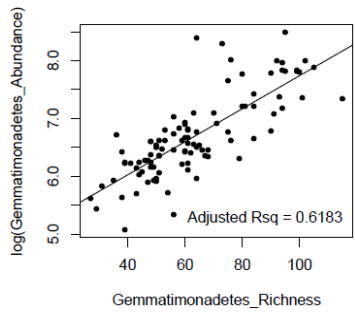



# G

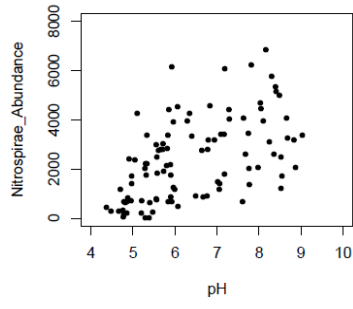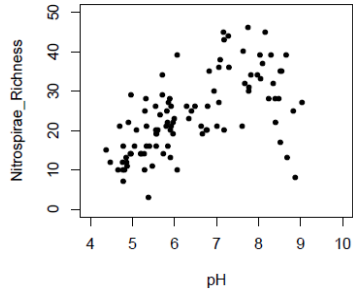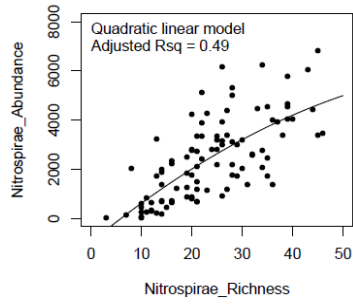

# H

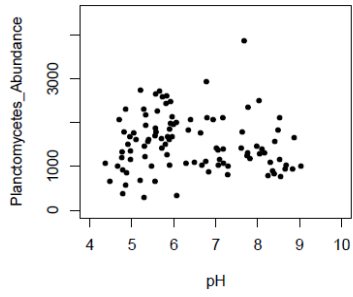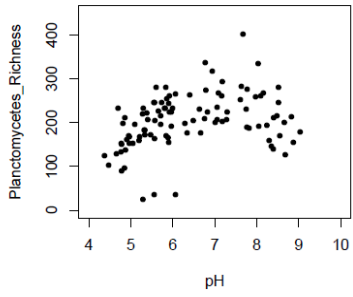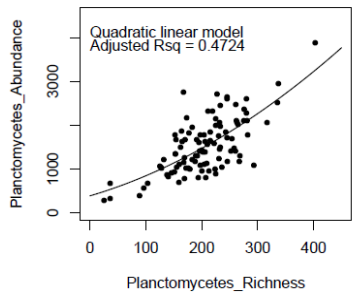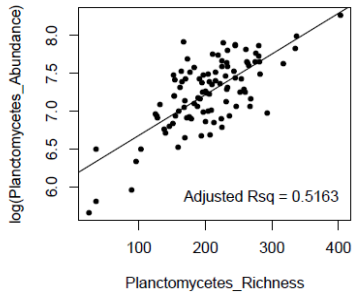

I

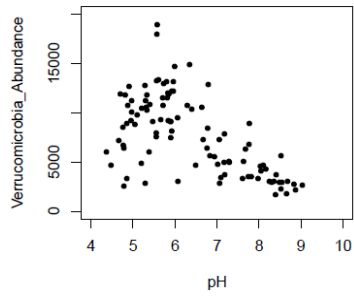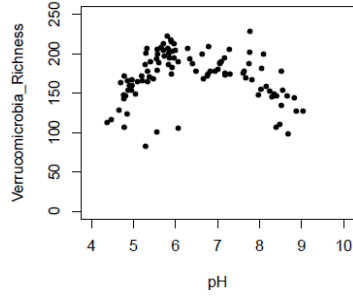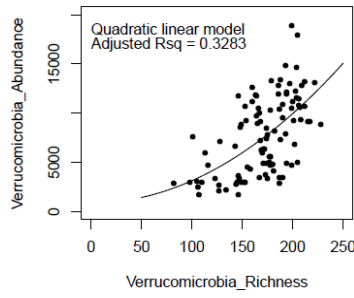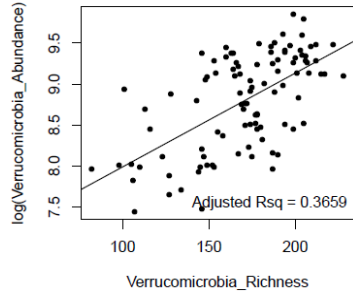

J

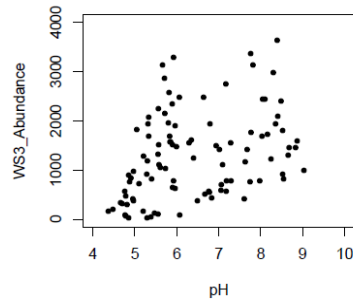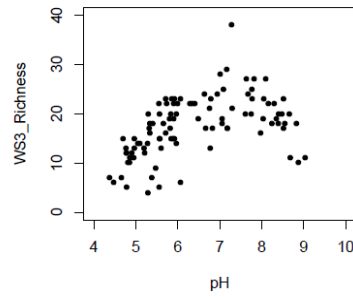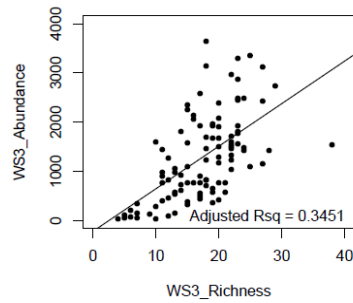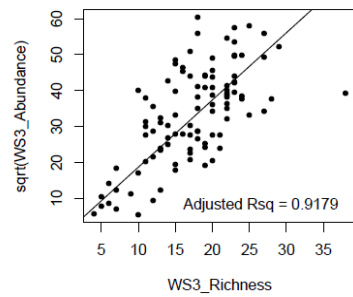

# K

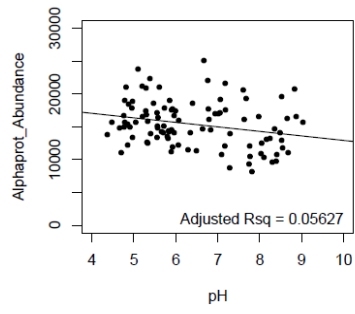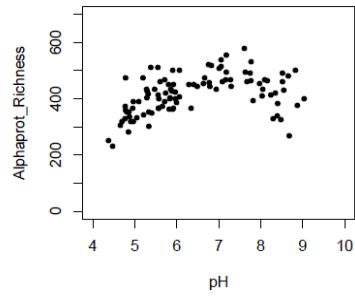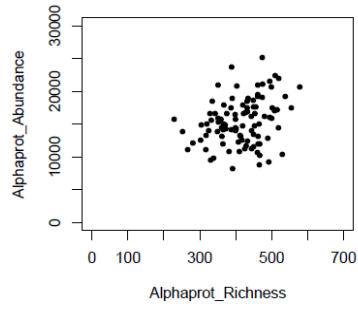

# L

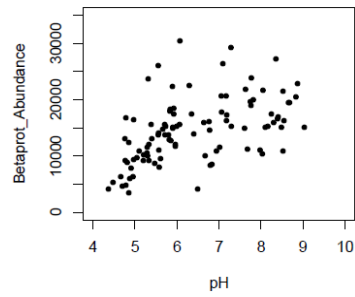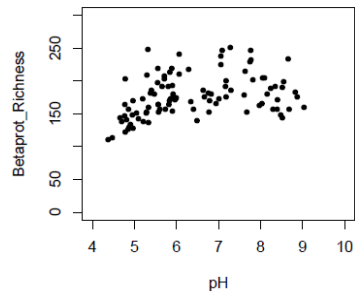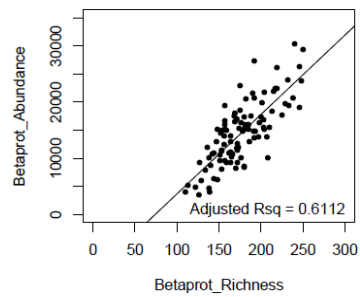

# M

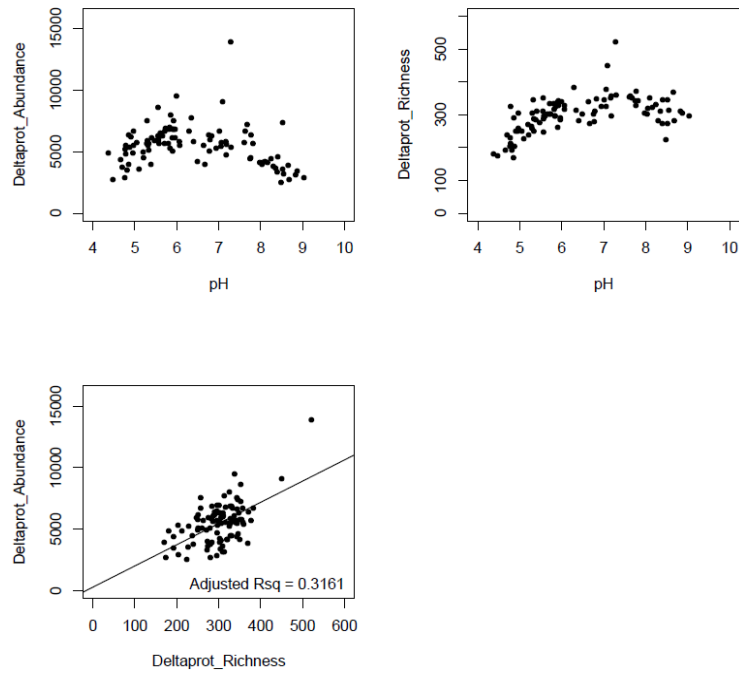

# N

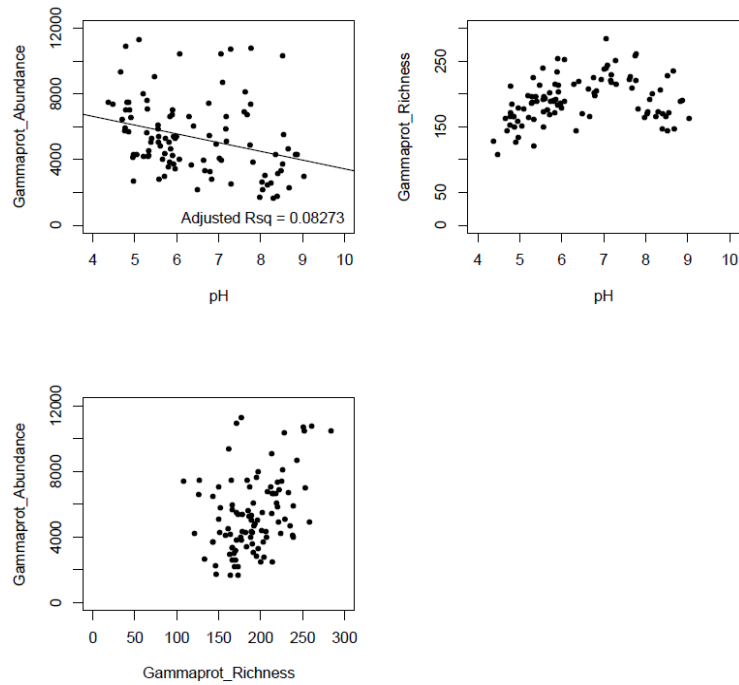

Supplementary figure 10. Relationships between relative abundance, OTU richness, and pH of the most abundant taxonomic groups. (A) Acidobacteria, (B) Actinobacteria, (C) Bacteroidetes, (D) Chloroflexi, (E) Firmicutes, (F) Gemmatimonadetes, (G) Nitrospirae, (H) Planctomycetes, (I) Verrucomicrobia, (J) WS3, (K) Alphaproteobacteria, (L) Betaproteobacteria, (M) Deltaproteobacteria, and (N) Gammaproteobacteria.

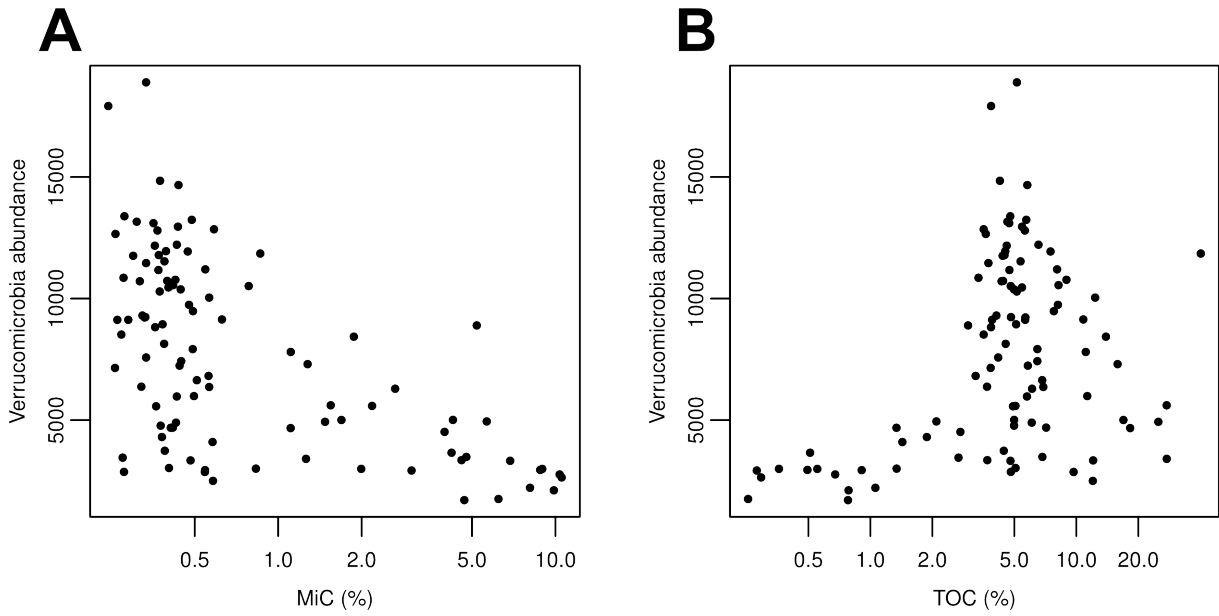

Supplementary Figure 11. Relationship between Verrucomicrobial relative abundance and (A) the soil mineral carbon content and (B) the soil total organic carbon content.

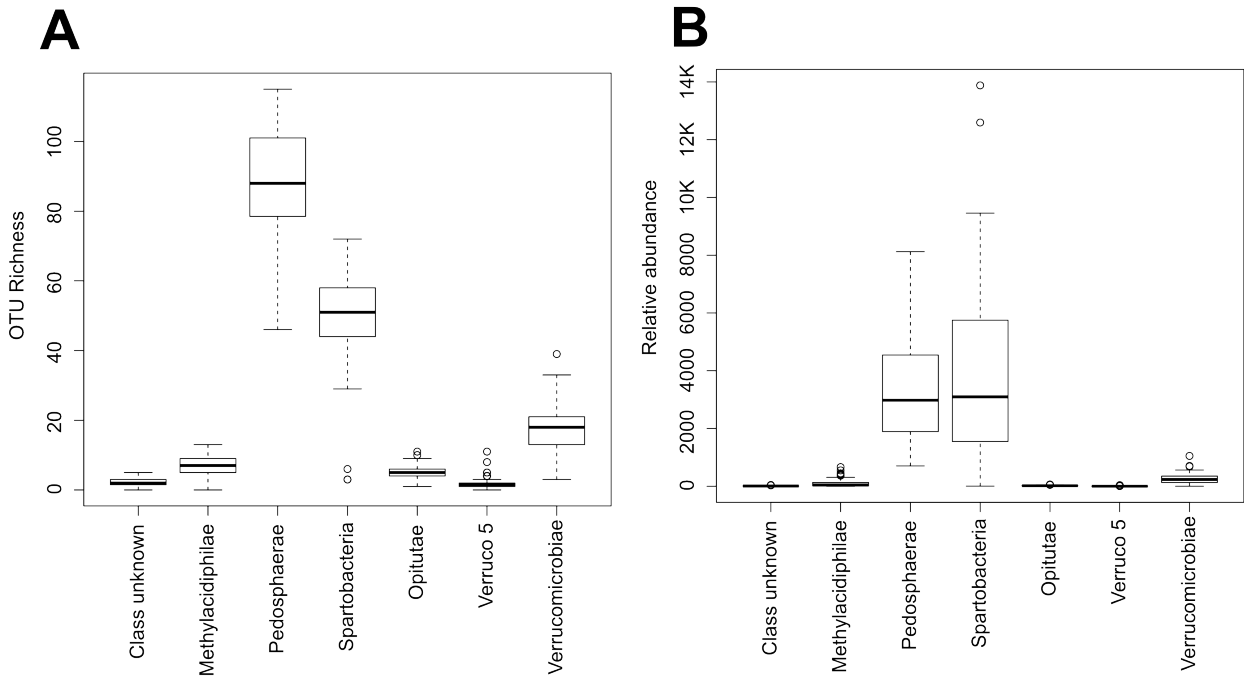

Supplementary Figure 12. Proportion of Verrucomicrobial classes across the alpine landscape. (A) Verrucomicrobial OTU richness and (B) relative abundance in the respective sites.

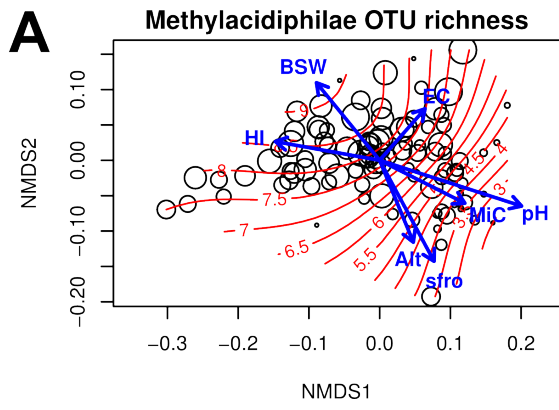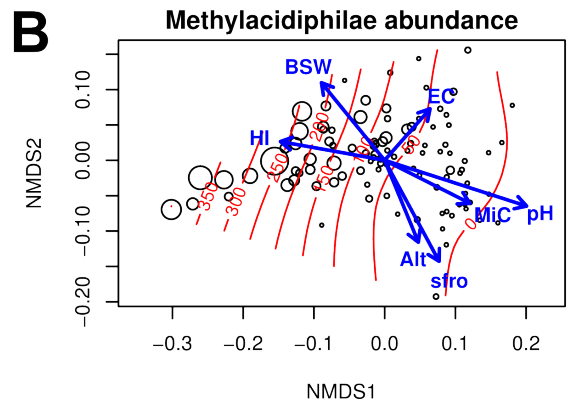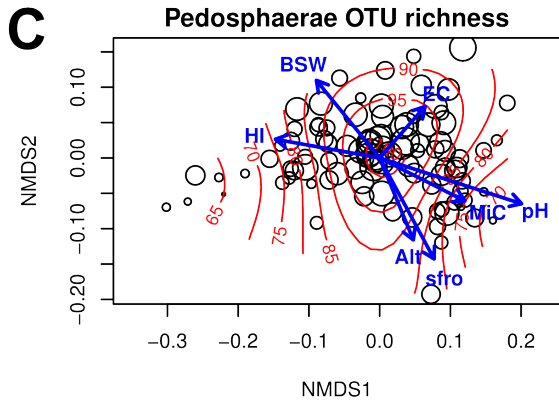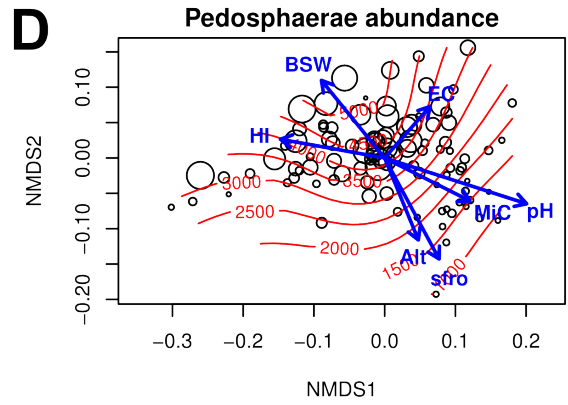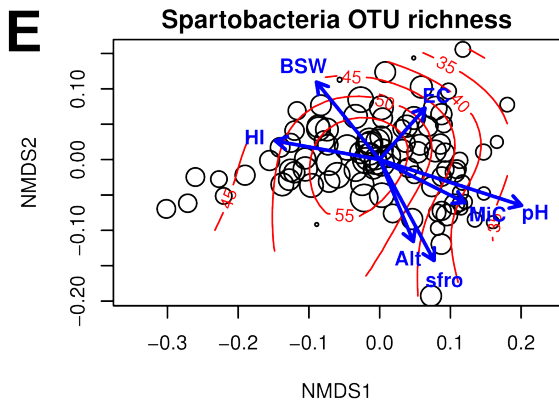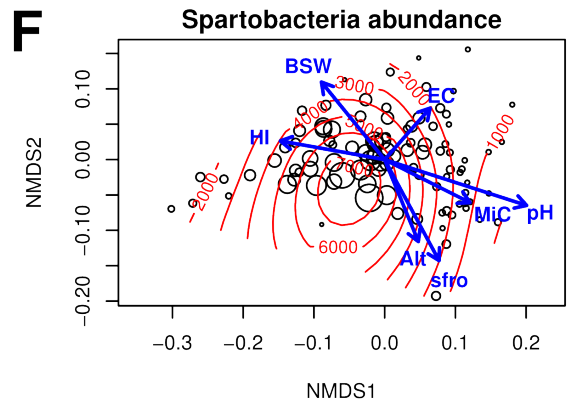

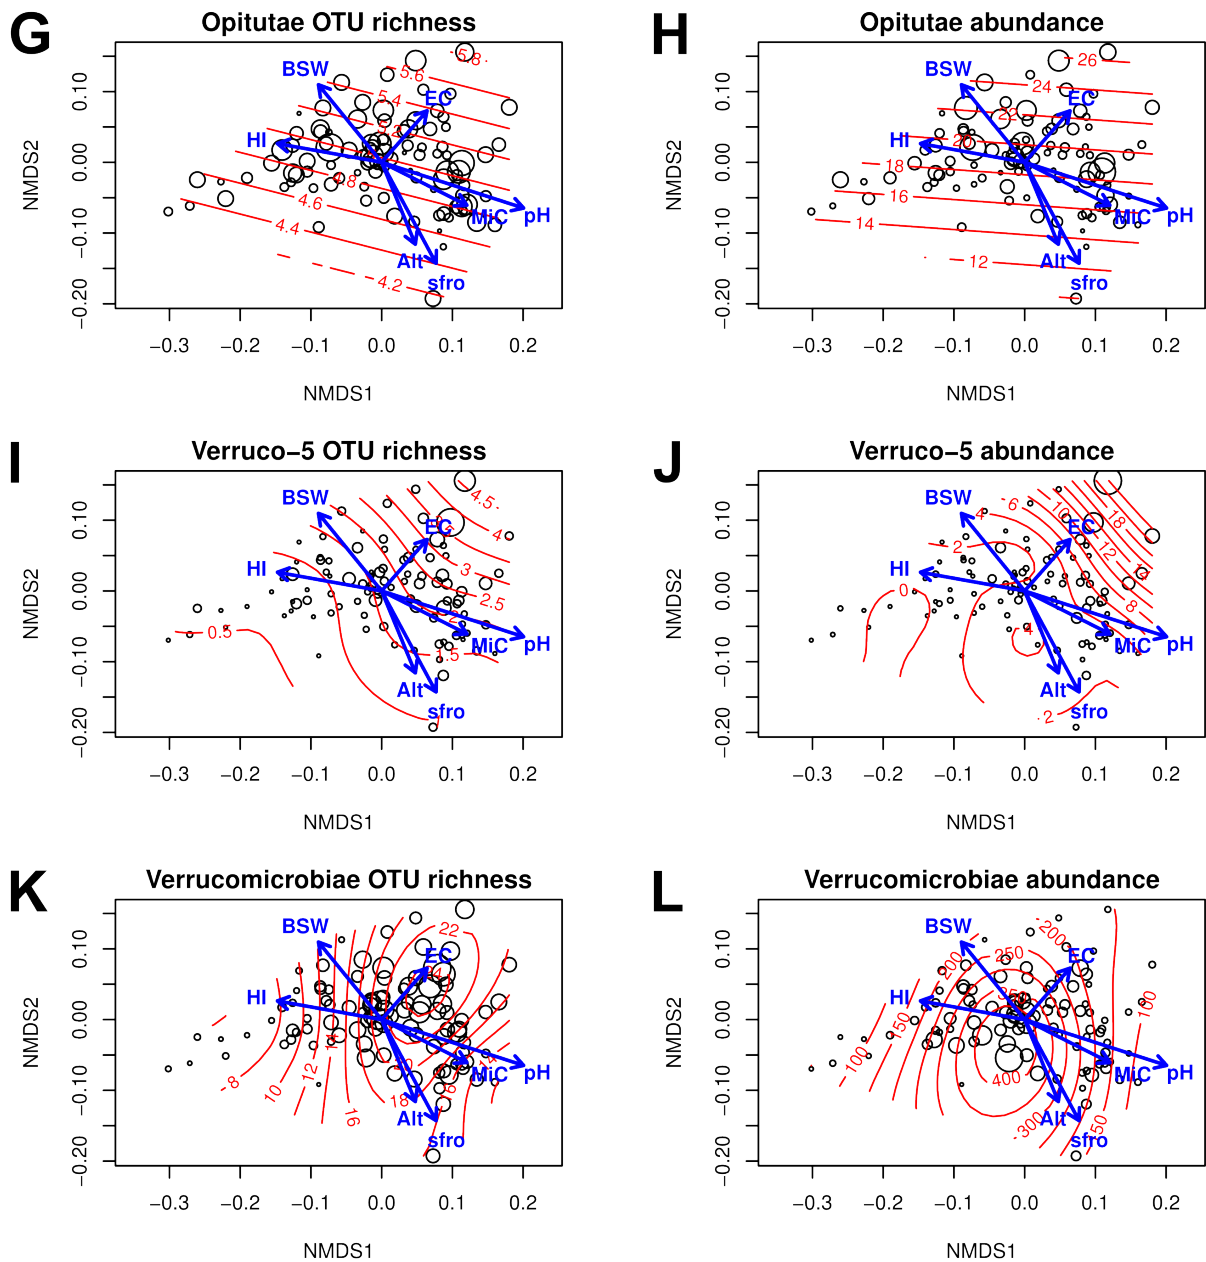

Supplementary Figure 13. Distribution of Verrucomicrobial class richness and abundance across ordination space, respectively of the (A-B) Methylacidiphiliae, (C-D) Pedosphaerae, (E-F) Spartobacteria, (G-H) Opitutae, (I-J) Verruco 5, and (K-L) Verrucomicrobiae. The bubble size depicts the relative richness or abundance of a Verrucomicrobial class at each sampling site, while the red contours show the smooth response surface of the respective richness or relative abundance. Only the most relevant environmental variables are shown as envfit vectors.

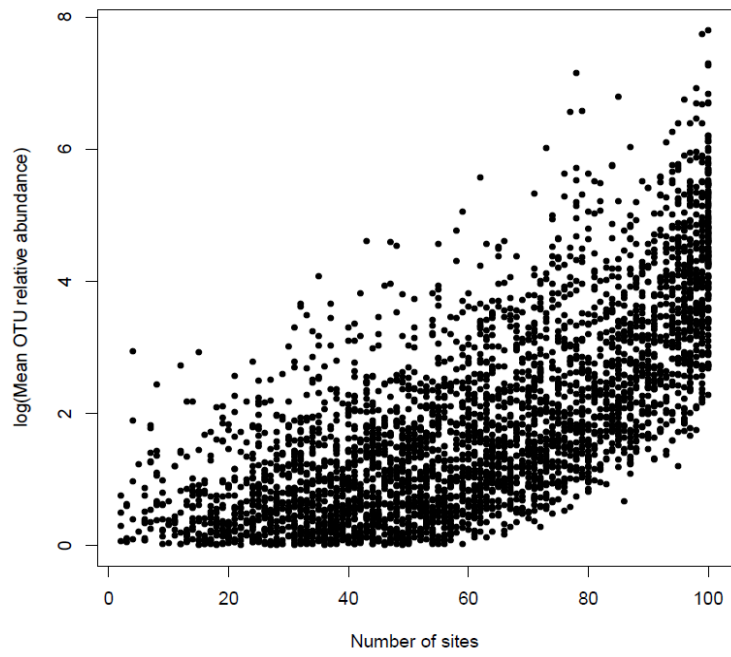

Supplementary Figure 14. Abundance vs. occupancy plot for the alpine soil bacterial OTUs determined according to a similarity threshold of 97%.



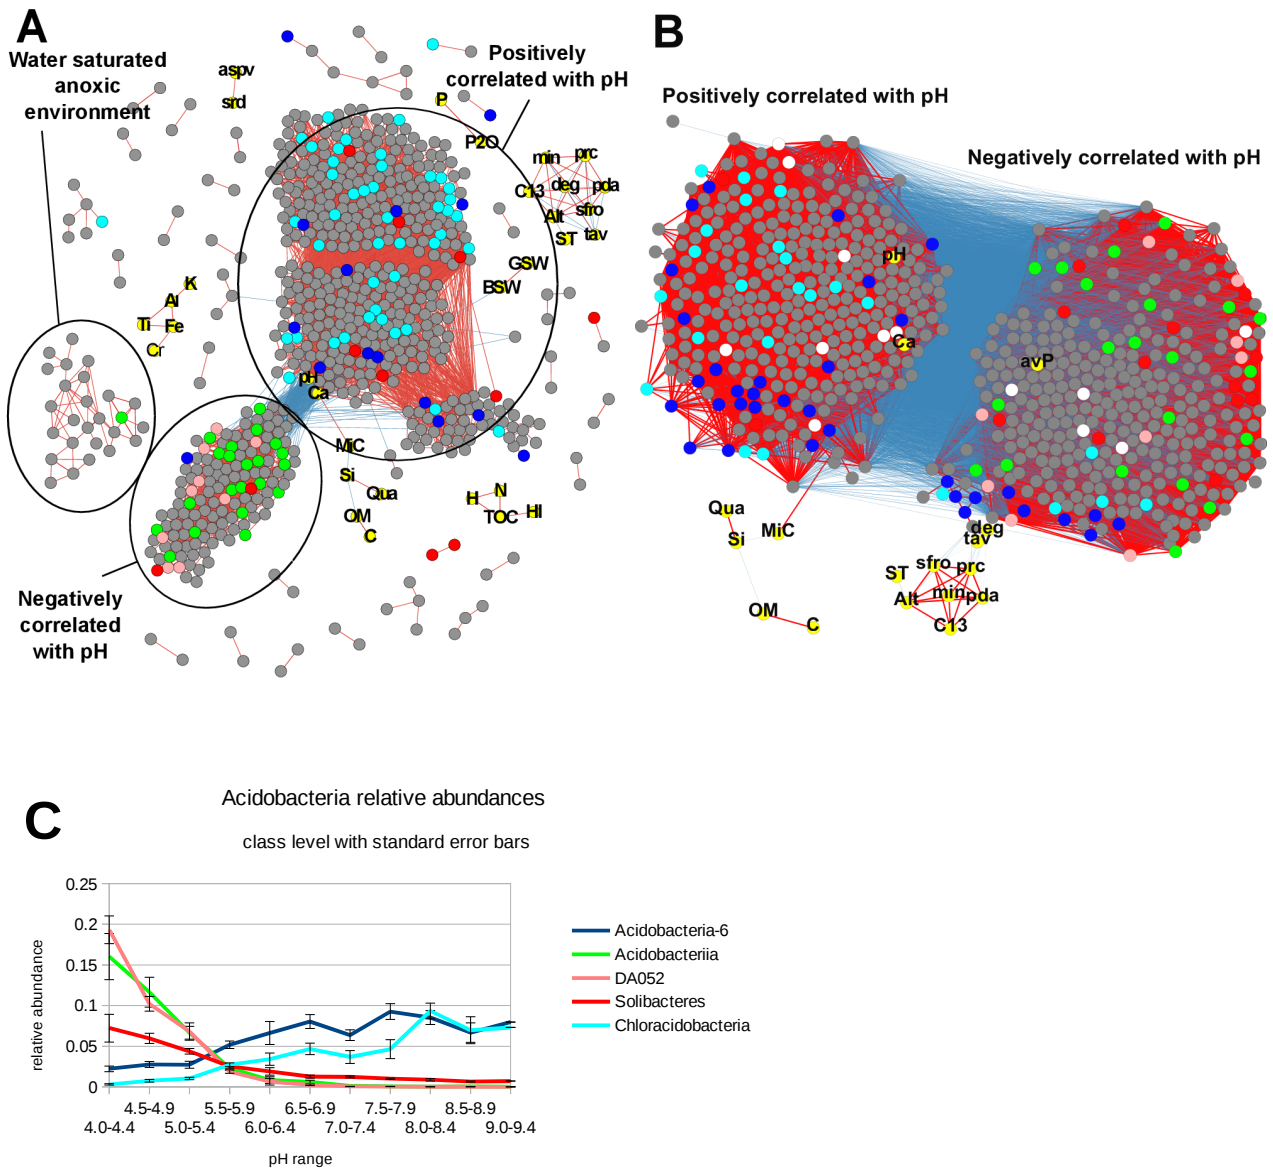

Supplementary Figure 15. Correlation between the relative abundance of Acidobacteria and soil pH at the class and OTU levels. Global co-occurrence networks with nodes color-coded according to the different classes of Acidobacteria: Solibacteres (red), DA052 (pink), Acidobacteriia (green), Acidobacteria-6 (blue), Chloracidobacteria (cyan), and other bacteria (gray). Positive correlations are red edges and negative correlations are blue edges. (A) Yifan Hu Multilevel network of the less commonly found bacterial OTUs; (B) Force Atlas 2 network of the more commonly found bacterial OTUs from just the major cluster excluding the module with the spurious correlations; and (C) the relative abundance of the different acidobacterial classes as a function of pH.

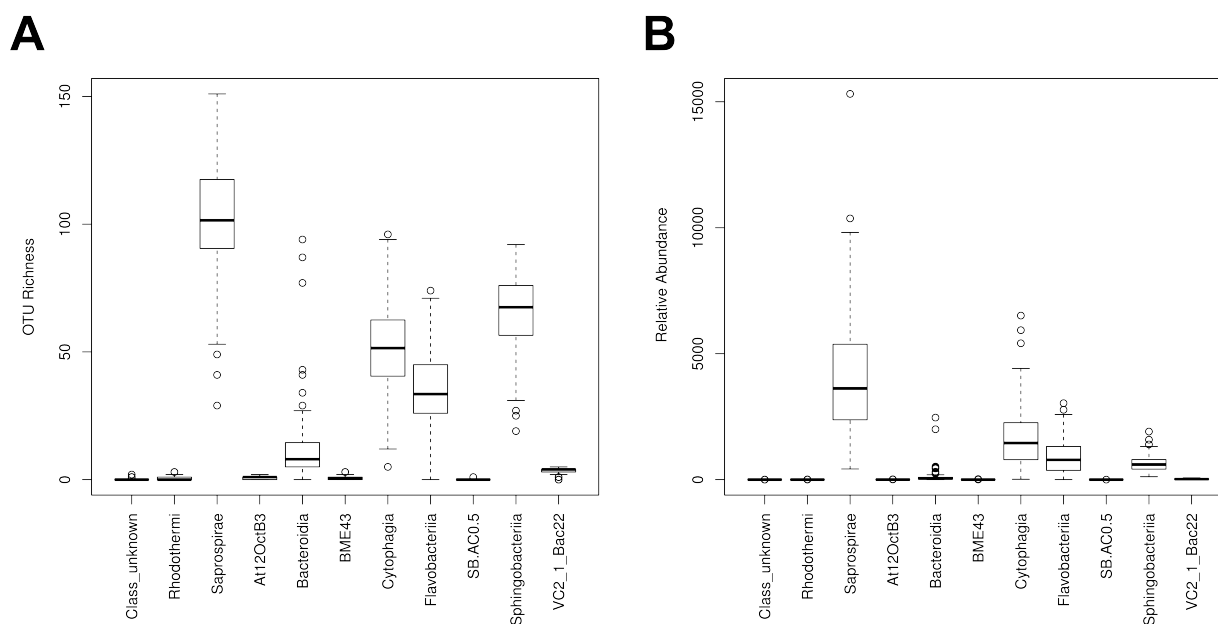

Supplementary Figure 16. Proportion of Bacteroidetes classes across the alpine landscape. (A) The OTU richness and (B) the relative abundance in the respective sites.

## References

1. Bartram AK, Lynch MDJ, Stearns JC, Moreno-Hagelsieb G, Neufeld JD. 2011. Generation of Multimillion-Sequence 16S rRNA Gene Libraries from Complex Microbial Communities by Assembling Paired-End Illumina Reads. *Appl Env Microbiol* **77**:3846–3852.
2. Degnan PH, Ochman H. 2012. Illumina-based analysis of microbial community diversity. *ISME J* **6**:183–194.
3. Hummelen R, Fernandes AD, Macklaim JM, Dickson RJ, Chagalucha J, Gloor GB, Reid G. 2010. Deep Sequencing of the Vaginal Microbiota of Women with HIV. *PLoS ONE* **5**:e12078.
4. Huws SA, Edwards JE, Kim EJ, Scollan ND. 2007. Specificity and sensitivity of eubacterial primers utilized for molecular profiling of bacteria within complex microbial ecosystems. *Journal of Microbiological Methods* **70**:565–569.
5. Keijser BJB, Zaura E, Huse SM, van der Vossen JMBM, Schuren FHJ, Montijn RC, ten Cate JM, Crielaard W. 2008. Pyrosequencing analysis of the Oral Microflora of healthy adults. *Journal of Dental Research* **87**:1016–1020.
6. Lazarevic V, Whiteson K, Huse S, Hernandez D, Farinelli L, Østerås M, Schrenzel J, François P. 2009. Metagenomic study of the oral microbiota by Illumina high-throughput sequencing. *Journal of Microbiological Methods* **79**:266–271.
7. Liu Z, Lozupone C, Hamady M, Bushman FD, Knight R. 2007. Short pyrosequencing reads suffice for accurate microbial community analysis. *Nucl Acids Res* **35**:e120.
8. Sogin ML, Morrison HG, Huber JA, Welch DM, Huse SM, Neal PR, Arrieta JM, Herndl GJ. 2006. Microbial diversity in the deep sea and the underexplored “rare biosphere.” *Proceedings of the National Academy of Sciences* **103**:12115–12120.
9. Wang Y, Qian P-Y. 2009. Conservative Fragments in Bacterial 16S rRNA Genes and Primer Design for 16S Ribosomal DNA Amplicons in Metagenomic Studies. *PLoS ONE* **4**:e7401.
